# Supplementary material
Source: ML conference proceedings conference paper supplement (https://openaccess.thecvf.com/content/WACV_2020/html/Ghosh_Stacked_Spatio-Temporal_Graph_WACV_2020_paper.html)
Supplement: Supplementary file 1 [file Ghosh_Stacked_Spatio-Temporal_Graph_WACV_2020_supplemental.pdf]

Archive with 6 entries (5 files):
- 0534-supp/
- __MACOSX/._0534-supp
- 0534-supp/README.txt
- __MACOSX/0534-supp/._README.txt
- 0534-supp/video_Charades_results.mp4
- __MACOSX/0534-supp/._video_Charades_results.mp4
