# Supplementary material
Source: ML conference proceedings conference paper supplement (https://openaccess.thecvf.com/content/WACV_2020/html/Ghosh_Stacked_Spatio-Temporal_Graph_WACV_2020_paper.html)
Supplement: Supplementary file 1 [file Ghosh_Stacked_Spatio-Temporal_Graph_WACV_2020_supplemental.pdf › 0534-supp/README.txt]

This video file contains the results of applying the I3D+Stacked-STGCN on 
one of the videos of Charades dataset which had a 19.09 mAP performance (Table5 in paper). 
The video is a MPEG-4 file with H.264 encoding.
The ground truth labels and top 5 predictions are displayed. 
The correct predictions are highlighted in green in the video.
